# Supplementary material for: Lysolipid receptor cross-talk regulates lymphatic endothelial junctions in lymph nodes
Source: PubMed Central journal article supplement — J Exp Med. 2019 May 30;216(7):1582–98. doi: 10.1084/jem.20181895 (PMC6605750; doi:10.1084/jem.20181895), 2019-05-30
Supplement: JEM_20181895_sm.pdf [file JEM_20181895_sm.pdf]

Supplemental material

Hisano et al., <https://doi.org/10.1084/jem.20181895>

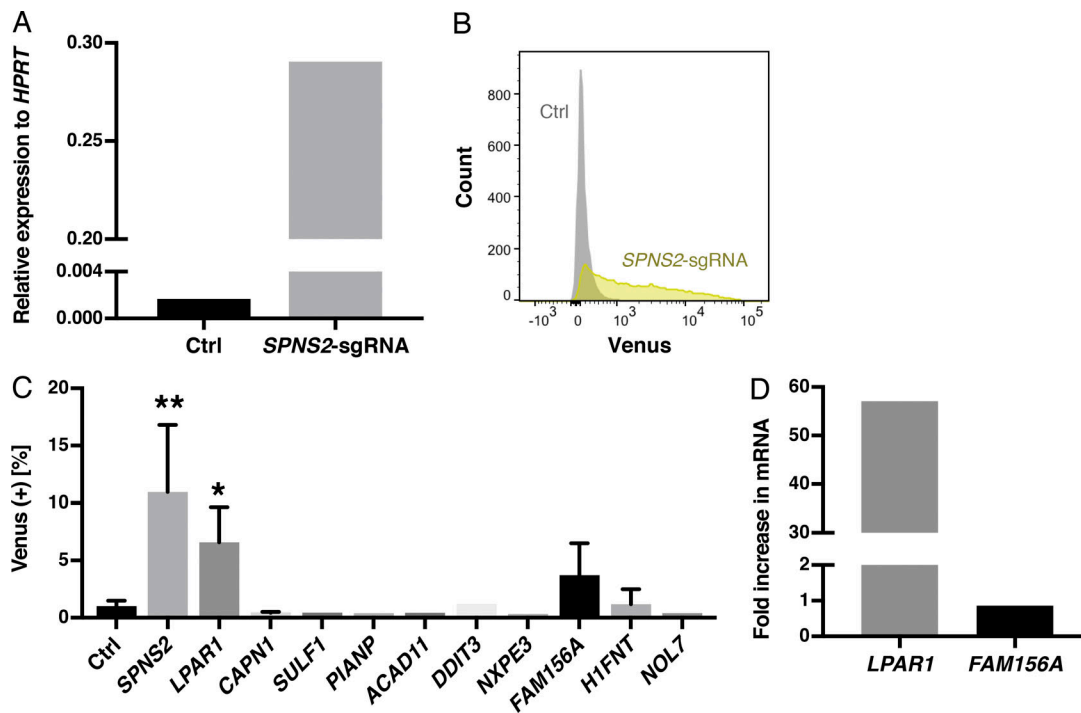

Figure S1. **SPNS2 and LPAR1 SAM sgRNAs activate target genes and Venus expression.** (A) *SPNS2* mRNA level was measured with quantitative PCR in the cells transduced with SAM sgRNA targeting the *SPNS2* gene or empty vector (Ctrl). (B) Flow cytometric analysis of Venus-expressing cells after induction of *SPNS2* expression with SAM sgRNA. (C) Individual SAM sgRNA of top 10 hits or *SPNS2* was transduced and the number of Venus-positive cells was counted with a flow cytometer.  $n = 1-9$  for each group; data are expressed as mean  $\pm$  SD. P values were determined by one-way ANOVA followed by Sidak's multiple comparisons test; \*\*,  $P = 0.0124$ ; \*,  $P \leq 0.0001$ . (D) Fold increase of mRNA expression by SAM sgRNA targeting *LPAR1* or *FAM156A* was measured by quantitative PCR.  $n = 1$ . Ctrl, control.

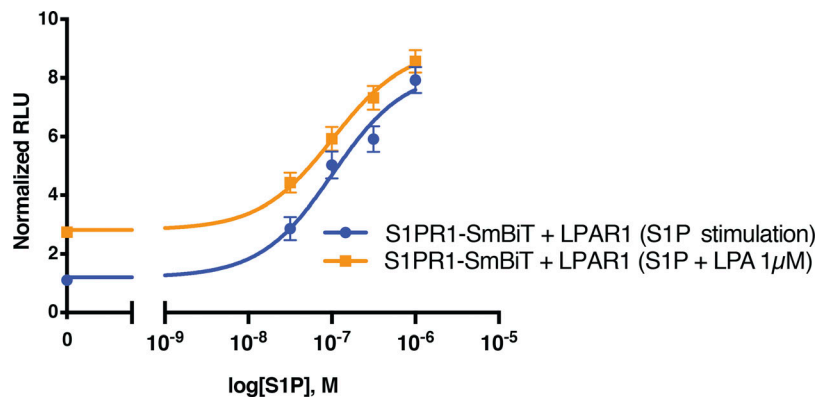

Figure S2. **LPAR1 stimulation with LPA causes an additive effect in S1P-stimulated S1PR1-SmBiT/ $\beta$ -arrestin coupling.** S1PR1-SmBiT and LPAR1 were cotransfected with LgBiT- $\beta$ -arrestin1 into HEK293 cells, and luminescence was measured ~15 min after S1P stimulation in the absence (blue line) or presence (orange line) of 1  $\mu$ M LPA.  $n = 3$  independent experiments in triplicate; data are expressed as mean  $\pm$  SEM. RLU, relative light units.

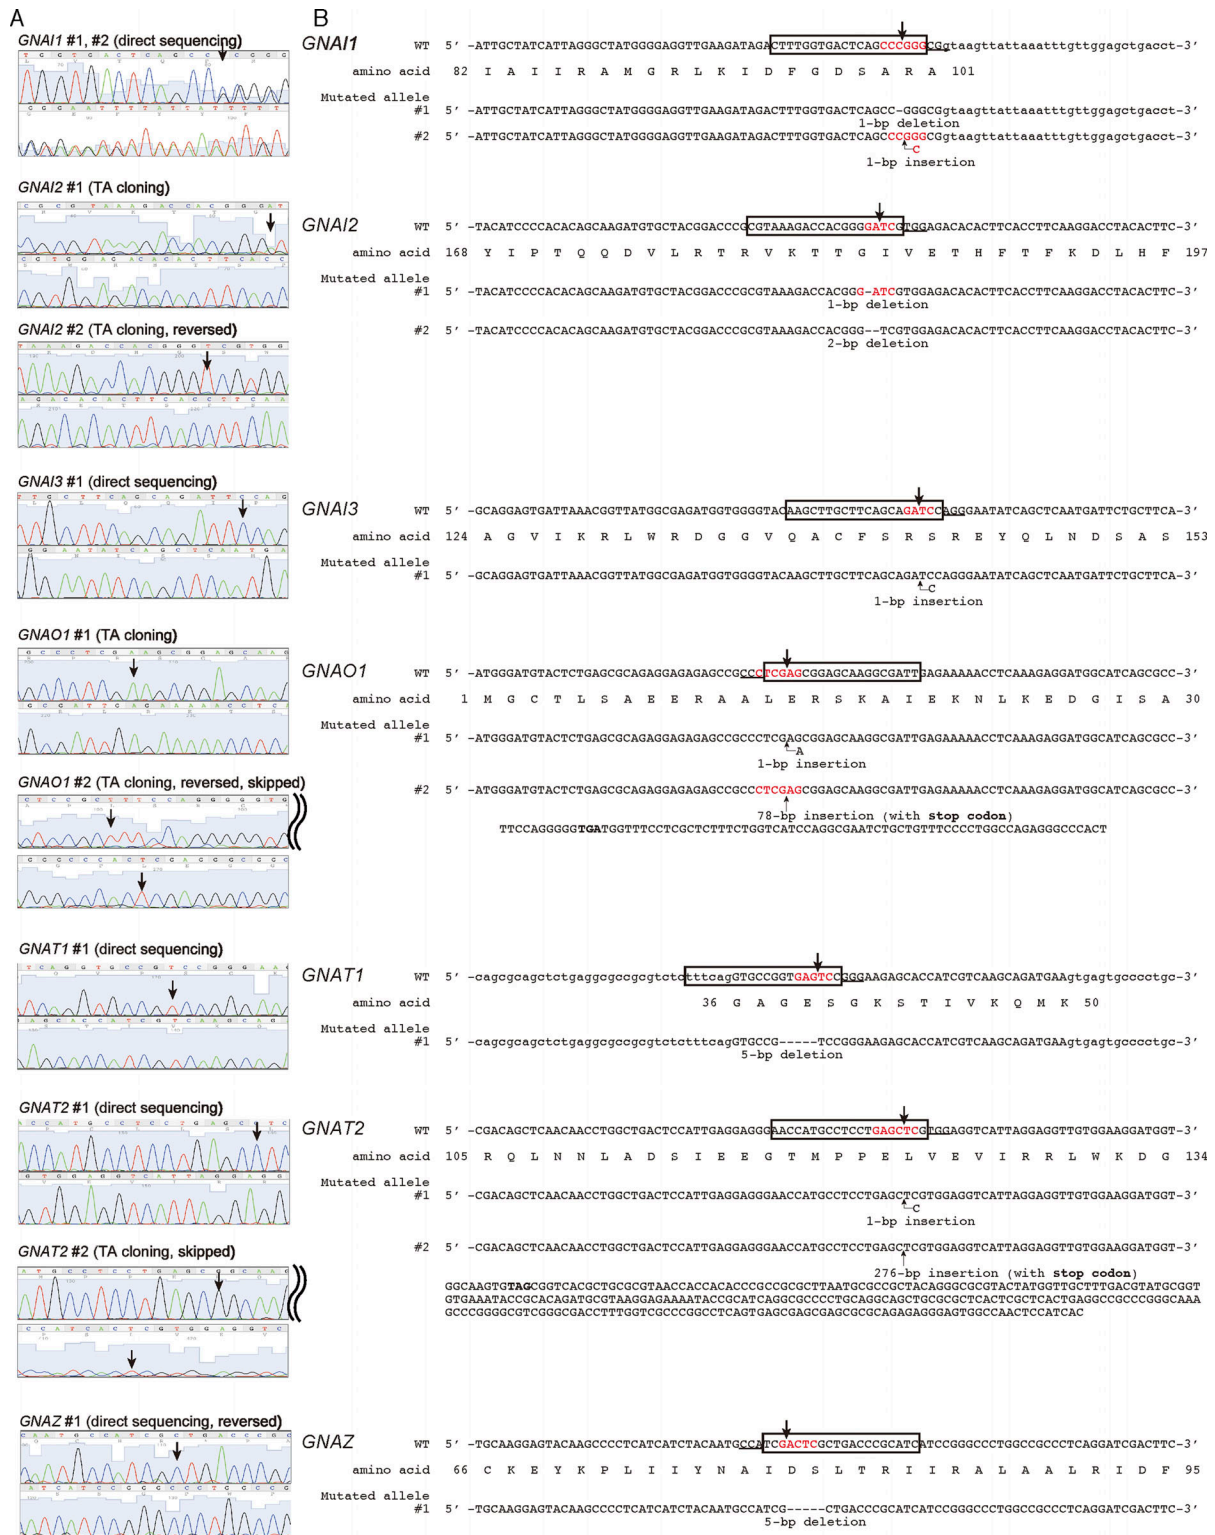

|               |               |               |                                                                                                          |                                                                                                       |     |
|---------------|---------------|---------------|----------------------------------------------------------------------------------------------------------|-------------------------------------------------------------------------------------------------------|-----|
| C             | GNA11_WT.seq  | 1             | MGCTLSAEDKAAVERSCKMIDRNLRDGEKAAREVKKLLLLGAGESGKSTIVKQMKI IHEAGYSEBECKQYKAVVYSNTIQS IIAIIRAMGRKIDFGDSAR   | 100                                                                                                   |     |
|               | GNA11_MT1.seq | 1             | MGCTLSAEDKAAVERSCKMIDRNLRDGEKAAREVKKLLLLGAGESGKSTIVKQMKI IHEAGYSEBECKQYKAVVYSNTIQS IIAIIRAMGRKIDFGDSAG   | 100                                                                                                   |     |
|               | GNA11_MT2.seq | 1             | MGCTLSAEDKAAVERSCKMIDRNLRDGEKAAREVKKLLLLGAGESGKSTIVKQMKI IHEAGYSEBECKQYKAVVYSNTIQS IIAIIRAMGRKIDFGDSAP   | 100                                                                                                   |     |
|               | GNA11_WT.seq  | 101           | ADDARQLFVLVLAGAEEGFMTAELAGVIKRLWKDSGVQACFNRSREYQLNDSAAYYLNDLDRIAQPNYIPTQQDVLRTRVKTTGIVETHFTFKDLHFKMPD    | 200                                                                                                   |     |
|               | GNA11_MT1.seq | 101           | RMMHANS LC                                                                                               | 109                                                                                                   |     |
|               | GNA11_MT2.seq | 101           | GG                                                                                                       | 102                                                                                                   |     |
|               | GNA11_WT.seq  | 201           | VGGQSRERKKWIHCFEGVTAIFCVALSVDYDLVLAEDDEEMNRMHESMKLFDS ICNNKWFDTDS IILFLNKKDLFEEKIKKSPLTICYPEYAGSNTYEEAA  | 300                                                                                                   |     |
|               | GNA11_MT1.seq | 109           |                                                                                                          | 109                                                                                                   |     |
|               | GNA11_MT2.seq | 102           |                                                                                                          | 102                                                                                                   |     |
|               | GNA11_WT.seq  | 301           | AYIQCFEDLNKRKDTKEIYTHFTCATDTKNVQFVDAVTDV I IKNNLKDCGLF                                                   | 354                                                                                                   |     |
|               | GNA11_MT1.seq | 109           |                                                                                                          | 109                                                                                                   |     |
|               | GNA11_MT2.seq | 102           |                                                                                                          | 102                                                                                                   |     |
| D             | GNAI2_WT.seq  | 1             | MGCTVSAEDKAAAERSCKMIDKNLRDGEKAAREVKKLLLLGAGESGKSTIVKQMKI IHEDGYSEBECKQYRRAVVSNTIQS IMAIVKAMGNLQIDFADPSR  | 100                                                                                                   |     |
|               | GNAI2_MT1.seq | 1             | MGCTVSAEDKAAAERSCKMIDKNLRDGEKAAREVKKLLLLGAGESGKSTIVKQMKI IHEDGYSEBECKQYRRAVVSNTIQS IMAIVKAMGNLQIDFADPSR  | 100                                                                                                   |     |
|               | GNAI2_MT2.seq | 1             | MGCTVSAEDKAAAERSCKMIDKNLRDGEKAAREVKKLLLLGAGESGKSTIVKQMKI IHEDGYSEBECKQYRRAVVSNTIQS IMAIVKAMGNLQIDFADPSR  | 100                                                                                                   |     |
|               | GNAI2_WT.seq  | 101           | ADDARQLFALSCTAEEQGVLPDDLSGVIRRLWADHGVCACFRSREYQLNDSAAYYLNDLDRIAQSDYIPTQQDVLRTRVKTTGIVETHFTFKDLHFKMF      | 200                                                                                                   |     |
|               | GNAI2_MT1.seq | 101           | ADDARQLFALSCTAEEQGVLPDDLSGVIRRLWADHGVCACFRSREYQLNDSAAYYLNDLDRIAQSDYIPTQQDVLRTRVKTTGIVETHFTFKDLHFKMF      | 200                                                                                                   |     |
|               | GNAI2_MT2.seq | 101           | ADDARQLFALSCTAEEQGVLPDDLSGVIRRLWADHGVCACFRSREYQLNDSAAYYLNDLDRIAQSDYIPTQQDVLRTRVKTTGIVETHFTFKDLHFKMF      | 199                                                                                                   |     |
|               | GNAI2_WT.seq  | 201           | DVGGQSRERKKWIHCFEGVTAIFCVALSAYDLVLAEDDEEMNRMHESMKLFDS ICNNKWFDTDS IILFLNKKDLFEEKIKKSPLTICYPEYTGANKYDEA   | 300                                                                                                   |     |
|               | GNAI2_MT1.seq | 201           | MWVVSGLSGRSGSTALRASQPSSEA                                                                                | 225                                                                                                   |     |
|               | GNAI2_MT2.seq | 199           |                                                                                                          | 199                                                                                                   |     |
|               | GNAI2_WT.seq  | 301           | ASYIQSKFEDLNKRKDTKEIYTHFTCATDTKNVQFVDAVTDV I IKNNLKDCGLF                                                 | 355                                                                                                   |     |
|               | GNAI2_MT1.seq | 225           |                                                                                                          | 225                                                                                                   |     |
|               | GNAI2_MT2.seq | 199           |                                                                                                          | 199                                                                                                   |     |
| E             | GNAI3_WT.seq  | 1             | MGCTLSAEDKAAVERSCKMIDRNLRDGEKAAREVKKLLLLGAGESGKSTIVKQMKI IHEDGYSEBECKQYKAVVYSNTIQS IIAIIRAMGRKIDFGAAR    | 100                                                                                                   |     |
|               | GNAI3_MT1.seq | 1             | MGCTLSAEDKAAVERSCKMIDRNLRDGEKAAREVKKLLLLGAGESGKSTIVKQMKI IHEDGYSEBECKQYKAVVYSNTIQS IIAIIRAMGRKIDFGAAR    | 100                                                                                                   |     |
|               | GNAI3_WT.seq  | 101           | ADDARQLFVLVLAGSAAEGVMTPELAGVIKRLWRDGGVQACFSRREYQLNDSAAYYLNDLDRISQSNYIPTQQDVLRTRVKTTGIVETHFTFKDLHFKMPD    | 200                                                                                                   |     |
|               | GNAI3_MT1.seq | 101           | ADDARQLFVLVLAGSAAEGVMTPELAGVIKRLWRDGGVQACFSRREYQLNDSAAYYLNDLDRISQSNYIPTQQDVLRTRVKTTGIVETHFTFKDLHFKMPD    | 149                                                                                                   |     |
|               | GNAI3_WT.seq  | 201           | VGGQSRERKKWIHCFEGVTAIFCVALSVDYDLVLAEDDEEMNRMHESMKLFDS ICNNKWFDTDS IILFLNKKDLFEEKIKKSPLTICYPEYTGNSNTYEEAA | 300                                                                                                   |     |
|               | GNAI3_MT1.seq | 149           |                                                                                                          | 149                                                                                                   |     |
|               | GNAI3_WT.seq  | 301           | AYIQCFEDLNKRKDTKEIYTHFTCATDTKNVQFVDAVTDV I IKNNLKDCGLF                                                   | 354                                                                                                   |     |
|               | GNAI3_MT1.seq | 149           |                                                                                                          | 149                                                                                                   |     |
|               | F             | GNAO1_WT.seq  | 1                                                                                                        | MGCTLSAEEAALERSKAEIKNLKEDGISAAKDVKLLLLGAGESGKSTIVKQMKI IHEDGYSBECKQYKAVVYSNTIQS LAIVRAMDTLGIYGDKER    | 100 |
|               |               | GNAO1_MT1.seq | 1                                                                                                        | MGCTLSAEEAALERSKAEIKNLKEDGISAAKDVKLLLLGAGESGKSTIVKQMKI IHEDGYSBECKQYKAVVYSNTIQS LAIVRAMDTLGIYGDKER    | 19  |
|               |               | GNAO1_MT2.seq | 1                                                                                                        | MGCTLSAEEAALERSKAEIKNLKEDGISAAKDVKLLLLGAGESGKSTIVKQMKI IHEDGYSBECKQYKAVVYSNTIQS LAIVRAMDTLGIYGDKER    | 27  |
|               |               | GNAO1_WT.seq  | 101                                                                                                      | KADAKMVCDDVSRMEDTEFFSAELLSAMMRLWGDGSGIQCFNRSREYQLNDSAAYYLNDLDRIGAADYQTEQDILRTRVKTGIVETHFTFKDLHFKMF    | 200 |
| GNAO1_MT1.seq |               | 19            |                                                                                                          | 19                                                                                                    |     |
| GNAO1_MT2.seq |               | 27            |                                                                                                          | 27                                                                                                    |     |
| GNAO1_WT.seq  |               | 201           | DVGGQSRERKKWIHCFEGVTAIFCVALSVDYDLVLAEDDEEMNRMHESMKLFDS ICNNKWFDTDS IILFLNKKDLFEEKIKKSPLTICYPEYTGPNYEDA   | 300                                                                                                   |     |
| GNAO1_MT1.seq |               | 19            |                                                                                                          | 19                                                                                                    |     |
| GNAO1_MT2.seq |               | 27            |                                                                                                          | 27                                                                                                    |     |
| GNAO1_WT.seq  |               | 301           | AAAIQAQFESKNRSPNKEIYHMTCATDTNNIQQVDAVTDV I IANLRCGGLY                                                    | 354                                                                                                   |     |
| GNAO1_MT1.seq |               | 19            |                                                                                                          | 19                                                                                                    |     |
| GNAO1_MT2.seq |               | 27            |                                                                                                          | 27                                                                                                    |     |
| G             | GNAT1_WT.seq  | 1             | MGAGASAEKHSRELEKLLKEDAEKDARTVKLLLLGAGESGKSTIVKQMKI IHQDGYSEBECKLEFKA IYGNVLQS ILAIVRAMTTLNIQYGD SARQDDA  | 100                                                                                                   |     |
|               | GNAT1_MT1.seq | 1             | MGAGASAEKHSRELEKLLKEDAEKDARTVKLLLLGAGESGKSTIVKQMKI IHQDGYSEBECKLEFKA IYGNVLQS ILAIVRAMTTLNIQYGD SARQDDA  | 100                                                                                                   |     |
|               | GNAT1_WT.seq  | 101           | RKLMHMADTIEEGTMPKEMSDIIQRLWKDGGIQCFCFERASEYQLNDSAGYLSDLERLVTGYPVTEQDVLRSRVKTTGIIETQFSFKDLNFRMFDVGGQ      | 200                                                                                                   |     |
|               | GNAT1_MT1.seq | 101           | ADAHGRHYRGHDAQDGVGHHPAAVEGLRYPLGF                                                                        | 134                                                                                                   |     |
|               | GNAT1_WT.seq  | 201           | RSEKRWIHCFCFEGVTCIIFIAALSAYDMVLVEDDEVNRMHESLHFLNS ICNHRYPATTSIVLFLNKKDVFPEKIKKAHLSICFPDYDGPNTYEDAGNYIK   | 300                                                                                                   |     |
|               | GNAT1_MT1.seq | 134           |                                                                                                          | 134                                                                                                   |     |
|               | GNAT1_WT.seq  | 301           | VQFLELNMRDVKIYSHMTCATDTQNVKVFDAVTDV I I IKNLDCGLF                                                        | 350                                                                                                   |     |
|               | GNAT1_MT1.seq | 134           |                                                                                                          | 134                                                                                                   |     |
|               | H             | GNAT2_WT.seq  | 1                                                                                                        | MGSASAEKDELAKRSKELEKLLQEDADKEARTVKLLLLGAGESGKSTIVKQMKI IHQDGYSEBECKLEFKA IYGNVLQS ILAIVRAMTTLGIYAEFPC | 100 |
|               |               | GNAT2_MT1.seq | 1                                                                                                        | MGSASAEKDELAKRSKELEKLLQEDADKEARTVKLLLLGAGESGKSTIVKQMKI IHQDGYSEBECKLEFKA IYGNVLQS ILAIVRAMTTLGIYAEFPC | 100 |
|               |               | GNAT2_MT2.seq | 1                                                                                                        | MGSASAEKDELAKRSKELEKLLQEDADKEARTVKLLLLGAGESGKSTIVKQMKI IHQDGYSEBECKLEFKA IYGNVLQS ILAIVRAMTTLGIYAEFPC | 100 |
|               |               | GNAT2_WT.seq  | 101                                                                                                      | ADDGRQLNLDLADSEEGTPELVEVIRLWKDGGVQACFERAAEYQLNDSAAYYLNLQERITDPELPSQDVLRSRVKTTGIIETKFSVKDLNFRMFD       | 200 |
| GNAT2_MT1.seq |               | 101           | ADDGRQLNLDLADSEEGTPELVEVIRLWKDGGVQACFERAAEYQLNDSAAYYLNLQERITDPELPSQDVLRSRVKTTGIIETKFSVKDLNFRMFD          | 127                                                                                                   |     |
| GNAT2_MT2.seq |               | 101           | ADDGRQLNLDLADSEEGTPELVEVIRLWKDGGVQACFERAAEYQLNDSAAYYLNLQERITDPELPSQDVLRSRVKTTGIIETKFSVKDLNFRMFD          | 125                                                                                                   |     |
| GNAT2_WT.seq  |               | 201           | VGGQSRERKKWIHCFEGVTCIIFCAALSAYDMVLVEDDEVNRMHESLHFLNS ICNHRYPATTSIVLFLNKKDVFPEKIKKAHLSICFPDYDGPNTYEDAG    | 300                                                                                                   |     |
| GNAT2_MT1.seq |               | 127           |                                                                                                          | 127                                                                                                   |     |
| GNAT2_MT2.seq |               | 125           |                                                                                                          | 125                                                                                                   |     |
| GNAT2_WT.seq  |               | 301           | NYIKSQFLDLNMRKDVKEIYSHMTCATDTQNVKVFDAVTDV I I IKNLDCGLF                                                  | 354                                                                                                   |     |
| GNAT2_MT1.seq |               | 128           |                                                                                                          | 127                                                                                                   |     |
| GNAT2_MT2.seq |               | 126           |                                                                                                          | 125                                                                                                   |     |
| I             | GNAZ_WT.seq   | 1             | MGCQRSSBEKEAARRSRIDRLHRSSESQRQRREIKLLLLGAGESGKSTIVKQMKI IHSGGFNLEACKYKPLI IYNAIDSLTRIIRALAAALRIDFHNDR    | 100                                                                                                   |     |
|               | GNAZ_MT1.seq  | 1             | MGCQRSSBEKEAARRSRIDRLHRSSESQRQRREIKLLLLGAGESGKSTIVKQMKI IHSGGFNLEACKYKPLI IYNAIDSLTRIIRALAAALRIDFHNDR    | 100                                                                                                   |     |
|               | GNAZ_WT.seq   | 101           | AYDAVQLFALTGPAESKGEITPELLGVMMRLWADPGAQACFSRSSEYHLEDNAAYYLNDLDRIAAADIPTVEDILRSRDMTTGIVENKFTFKELTFKMF      | 200                                                                                                   |     |
|               | GNAZ_MT1.seq  | 101           | RRCAALCADGPR                                                                                             | 112                                                                                                   |     |
|               | GNAZ_WT.seq   | 201           | DVGGQSRERKKWIHCFEGVTAIFCVELSGYDLKLYEDNQTSRMAESLRLFDS ICNNWFINTSLILFLNKKDLLEAKIRRIPLTICYPEYKQNTYEEA       | 300                                                                                                   |     |
|               | GNAZ_MT1.seq  | 112           |                                                                                                          | 112                                                                                                   |     |
|               | GNAZ_WT.seq   | 301           | AVYIQRQFEDLNKRKDTKEIYSHFTCATDTSNIQVFDVAVTDV I I IKNLKYIGLC                                               | 355                                                                                                   |     |
|               | GNAZ_MT1.seq  | 112           |                                                                                                          | 112                                                                                                   |     |

Figure S3. Continued

Figure S3. **DNA sequences of the G $\alpha$  genomic loci in mutant HEK293 cells.** **(A)** Genomic DNA sequences near the sgRNA-target sites were analyzed by a direct sequencing method or TA-cloning method. Arrows indicate positions of sequences that mismatch those of the wild-type allele. **(B)** Nucleotide sequences of mutant clones. sgRNA target sequences are boxed, and PAM sequences (NGG) are underlined. Arrows indicate putative double-stranded break sites. Restriction enzyme sites are shown in red letters. Sequences in capital and lower letters indicate exons and introns, respectively. Note that all mutant alleles carried frameshift mutations or harbor a premature stop codon within the insertional sequences. **(C–I)** Alignment of deduced amino acids of the G-protein  $\alpha$  subunit mutant HEK293 cells. **(C)** Gai1 subunit encoded by the *GNAI1* gene. **(D)** Gai2 subunit encoded by the *GNAI2* gene. **(E)** Gai3 subunit encoded by the *GNAI3* gene. **(F)** Gao subunit encoded by the *GNAO1* gene. **(G)** Gat1 subunit encoded by the *GNAT1* gene. **(H)** Gat2 subunit encoded by the *GNAT2* gene. **(I)** Gaz subunit encoded by the *GNAZ* gene. Note that all alleles were introduced by a frameshift mutation or an insertional sequence carrying a premature stop codon and did not produce functional G $\alpha$  subunits owing to lack of the C-terminal residues critical for interaction with GPCRs.

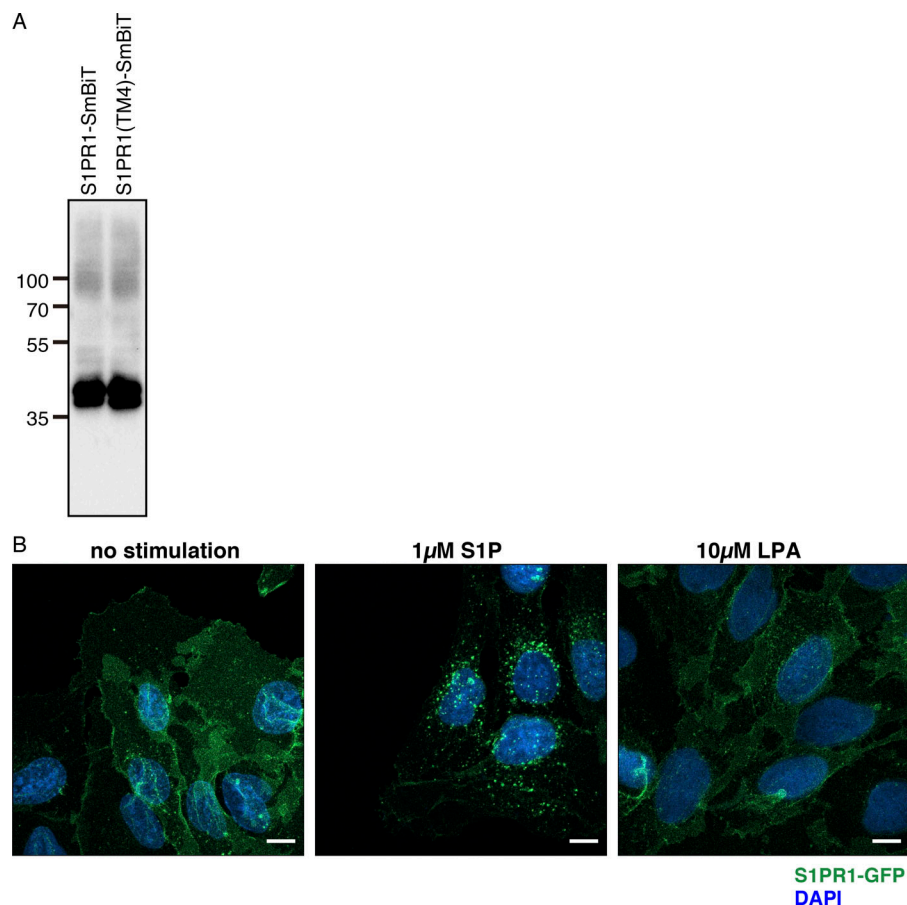

Figure S4. **S1PR1 protein expression and localization.** **(A)** 1 d after transfection of S1PR1-SmBiT or S1PR1(TM4)-SmBiT plasmid into HEK293A cells, the cells were harvested, and Western blotting was performed using anti-S1PR1 antibody. **(B)** S1PR1 polypeptide is not endocytosed after LPA stimulation. U2OS cells expressing S1PR1-GFP (green) and LPA1 were stimulated with 1  $\mu$ M S1P or 10  $\mu$ M LPA for 60 min after 3-h starvation with 0.1% BSA. Nuclei were stained with DAPI (blue). Bars, 10  $\mu$ m.



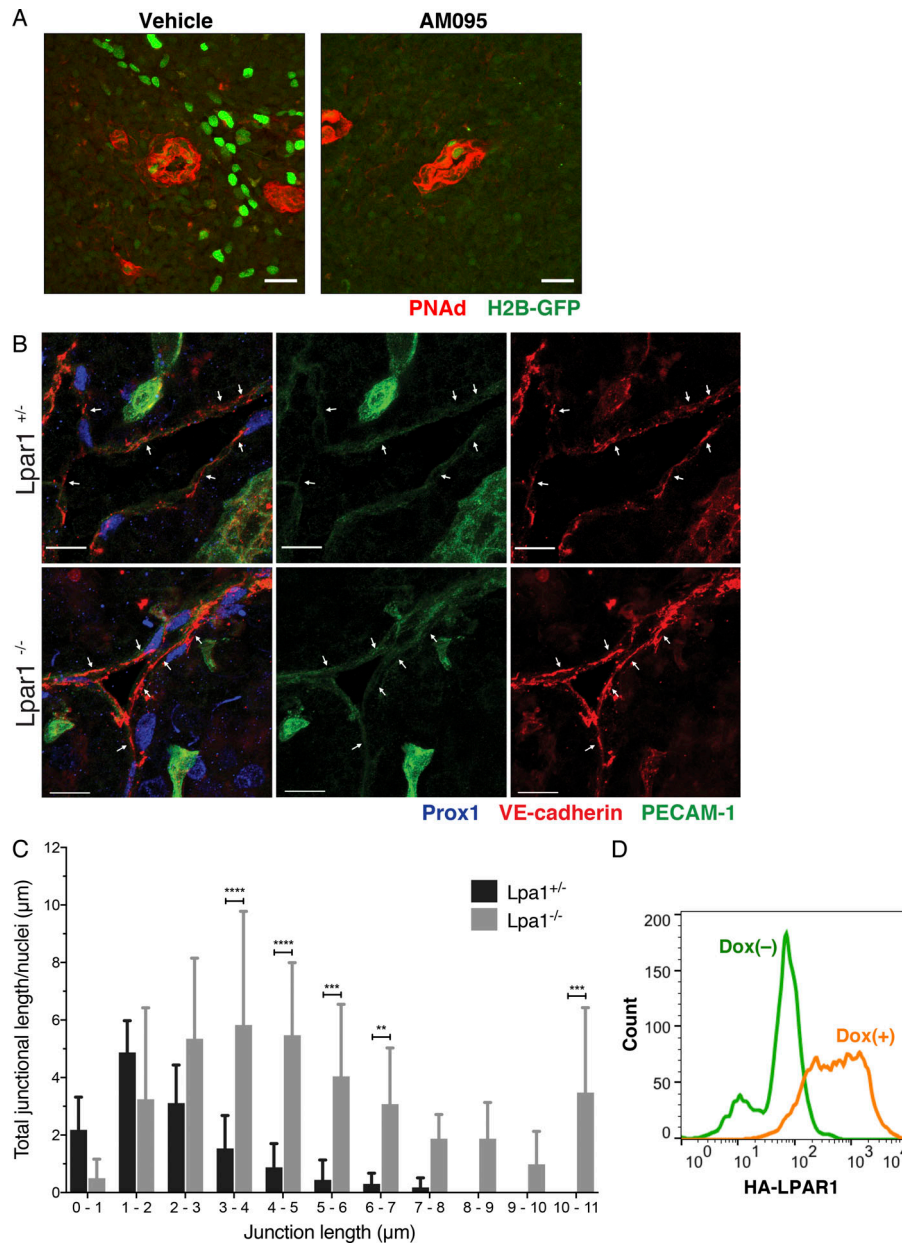

Figure S5. **LPAR1-mediated S1PR1/β-arrestin coupling regulates LEC junctions.** **(A)** S1PR1/β-arrestin coupling in HEV. Brachial lymph node sections from S1PR1-GFP signaling mice injected with vehicle or AM095 were stained with peripheral node addressin (PNAAd; red, HEV). Scale bars, 20 μm. **(B)** 35-μm lymph node sections from *Lpar1*<sup>+/+</sup> or *Lpar1*<sup>-/-</sup> mice were stained with Prox1 (blue, lymphatic endothelial nucleus), VE-cadherin (red), and PECAM-1 (green). Arrows indicate VE-cadherin-positive adherens junctions. Bars, 10 μm. **(C)** Quantification of junctional length in confocal images. *n* = 10–12 images each from two mice of each cohort; data are expressed as mean ± SD. P values were determined by Sidak’s multiple comparisons test; \*\*, *P* ≤ 0.0021; \*\*\*, *P* ≤ 0.0002; \*\*\*\*, *P* ≤ 0.0001. **(D)** The Tet-On system induced LPAR1 expression in HUVECs. Flow cytometric analysis of HA-LPAR1 on HUVEC/pLVX-TetOn-HA-LPAR1 with (orange line) or without (green line) doxycycline (Dox) using anti-HA antibody.
